# Supplementary material for: Graphene Nanosheets to Improve Physico-Mechanical Properties of Bioactive Calcium Silicate Cements
Source: Materials (Basel). 2017 May 31;10(6):606. doi: 10.3390/ma10060606 (PMC5553423; doi:10.3390/ma10060606)
Supplement: Supplementary file 1 [file materials-10-00606-s001.pdf]

# Supplementary Materials: Graphene Nanosheets to Improve Physico-Mechanical Properties of Bioactive Calcium Silicate Cements

Nileshkumar Dubey, Sneha Sundar Rajan, Yuri Dal Bello, Kyung-San Min and Vinicius Rosa

Figure S1 shows the fracture modes observed for the push-out bond strength. The addition of GNS did not favoured the occurrence of a particular pattern.

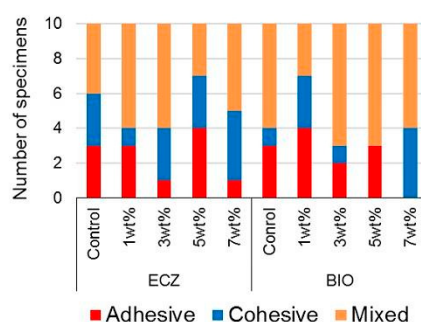

**Figure S1.** Fracture modes obtained from the push-out bond testing.

Figure S2 shows the dental pulp stem cell viability after 3 (Fig. S2A) and five days (Fig. S2B) under the treatments with extracts obtained. There was no decrease in cell viability for any of the conditions tested for both time points.

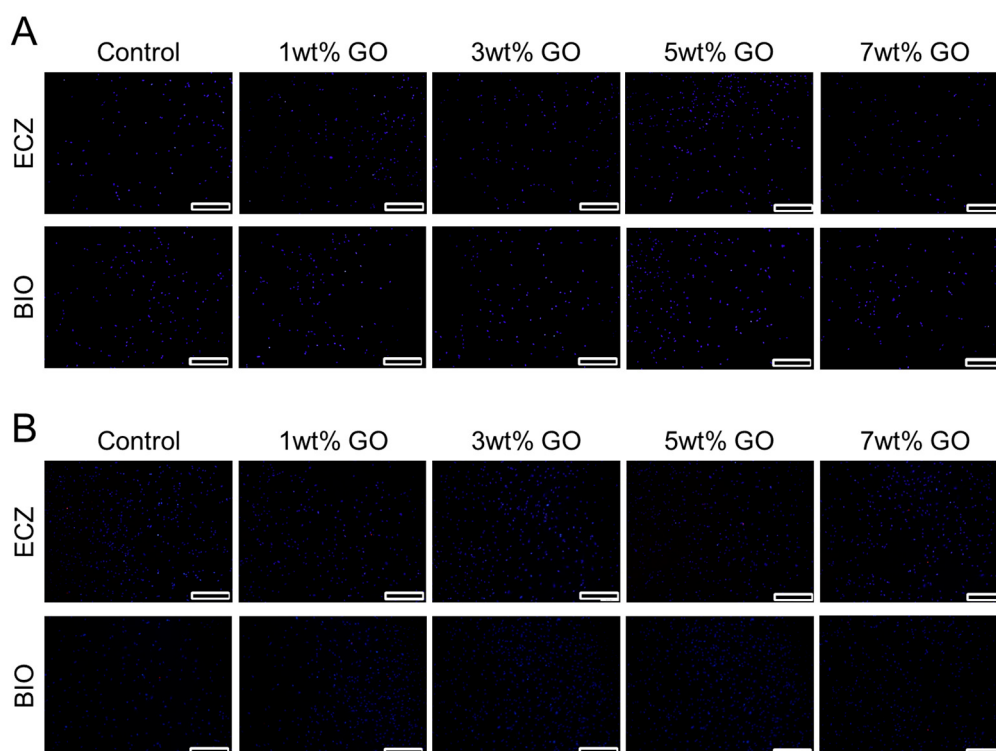

**Figure S2.** Dental pulp stem cells viability after 3 (A) and 5 (B) days.
